# Supplementary material for: SIGNATURE-DRIVEN REPURPOSING OF MIDOSTAURIN FOR COMBINATION WITH MEK1/2 AND KRASG12C INHIBITORS IN LUNG CANCER
Source: Research Square preprint supplement (doi:10.21203/rs.3.rs-3100885/v1), 2023-06-26
Supplement: Supplementary file 1 [file 909c48d38a4b71cafa74fa89.xlsx]

## Sheet: HeatmapSelectedGOTop100_Fig 6A
GO,Description,_LogP_COMBO vs C vs T and M,_LogP_MIDO vs C,_LogP_TRAM vs C
M281,PID FAK PATHWAY,-3.0180680127190396,-3.993036861241257,0.0
R-HSA-5653656,Vesicle-mediated transport,-2.7970794977463864,-3.354247561192744,0.0
R-HSA-9006931,Signaling by Nuclear Receptors,-2.5226805118199342,-2.107580275777841,0.0
GO:0051052,regulation of DNA metabolic process,-3.196634139680366,-2.6221094590121403,0.0
R-HSA-422475,Axon guidance,-9.550875122546609,-3.3515382535766967,0.0
GO:0043112,receptor metabolic process,-4.347574791816308,0.0,0.0
M212,PID INTEGRIN5 PATHWAY,-4.654653879667177,0.0,0.0
GO:0051099,positive regulation of binding,-5.760586388858277,0.0,0.0
M66,PID MYC ACTIV PATHWAY,-5.212000282081341,0.0,0.0
GO:0032271,regulation of protein polymerization,-5.00396554682404,0.0,0.0
R-HSA-373753,Nephrin family interactions,-4.245088233953419,0.0,0.0
R-HSA-75153,Apoptotic execution phase,-4.594203744850325,0.0,0.0
R-HSA-8956320,Nucleobase biosynthesis,-4.827102358117356,0.0,0.0
GO:0022613,ribonucleoprotein complex biogenesis,-4.700398518145617,0.0,0.0
R-HSA-72702,Ribosomal scanning and start codon recognition,-9.09591023190485,0.0,0.0
hsa04810,Regulation of actin cytoskeleton,-6.326531660765604,0.0,0.0
R-HSA-195258,RHO GTPase Effectors,-8.025912871165511,0.0,0.0
GO:0045540,regulation of cholesterol biosynthetic process,-3.203331486230934,0.0,0.0
GO:0022618,ribonucleoprotein complex assembly,-3.902771027016784,0.0,0.0
GO:0031397,negative regulation of protein ubiquitination,-3.8789566277460334,0.0,0.0
R-HSA-1474244,Extracellular matrix organization,-3.335600101442917,0.0,0.0
GO:0043901,negative regulation of multi-organism process,-3.548578359900296,0.0,0.0
M12,PID RHOA PATHWAY,-3.3638121584958336,0.0,0.0
R-HSA-5218920,VEGFR2 mediated vascular permeability,-3.9366775713494913,0.0,0.0
GO:0014812,muscle cell migration,-2.3038867103445684,0.0,0.0
GO:0046459,short-chain fatty acid metabolic process,0.0,-4.361011378603156,0.0
GO:0007080,mitotic metaphase plate congression,0.0,-4.311466777602682,0.0
GO:0007420,brain development,0.0,-4.979812508063002,0.0
GO:0006399,tRNA metabolic process,0.0,-3.8738869465845416,0.0
GO:0070201,regulation of establishment of protein localization,0.0,-2.352333806952432,0.0
GO:1902041,regulation of extrinsic apoptotic signaling pathway via death domain receptors,0.0,-2.7146615204343276,0.0
GO:0006790,sulfur compound metabolic process,0.0,-2.3588915634627456,-7.1140189126621625
GO:0009991,response to extracellular stimulus,0.0,-2.1917839122957687,-5.362938208036173
R-HSA-8950505,Gene and protein expression by JAK-STAT signaling after Interleukin-12 stimulation,0.0,-3.2945014538931203,-4.1448900166148555
hsa00020,Citrate cycle (TCA cycle),0.0,-3.6017929194215914,-4.659057133913741
M40,PID E2F PATHWAY,0.0,-2.4551597580764843,-3.674228819068929
GO:0022900,electron transport chain,0.0,-2.1391167753998994,-3.49592753985711
hsa00240,Pyrimidine metabolism,0.0,-5.350511208360991,-3.6914057449262114
GO:0048732,gland development,0.0,-4.066980583224186,-3.1832157418699514
hsa01200,Carbon metabolism,0.0,-7.638456645958335,-16.227563605040295
GO:0016999,antibiotic metabolic process,0.0,-4.409881121798405,-7.60628504860464
GO:0009204,deoxyribonucleoside triphosphate catabolic process,0.0,0.0,-3.919624746278635
GO:0042692,muscle cell differentiation,0.0,0.0,-3.74976768572548
GO:0072593,reactive oxygen species metabolic process,0.0,0.0,-3.8877488484917144
GO:0098930,axonal transport,0.0,0.0,-3.2314103687701436
GO:0002064,epithelial cell development,0.0,0.0,-3.6051260225503228
GO:0045176,apical protein localization,0.0,0.0,-3.402374833718478
GO:0051014,actin filament severing,0.0,0.0,-3.7684350755690037
GO:0007005,mitochondrion organization,0.0,0.0,-3.2540116777923593
GO:0003334,keratinocyte development,0.0,0.0,-3.5126120624922876
R-HSA-69205,G1/S-Specific Transcription,0.0,0.0,-3.548644334770379
GO:0006997,nucleus organization,0.0,0.0,-3.008172002362697
GO:0097066,response to thyroid hormone,0.0,0.0,-3.6773715982580644
GO:1901568,fatty acid derivative metabolic process,0.0,0.0,-3.748431045954622
GO:0051262,protein tetramerization,0.0,0.0,-5.130247070483476
hsa04216,Ferroptosis,0.0,0.0,-4.0354652233710215
hsa00052,Galactose metabolism,0.0,0.0,-4.58675408685204
GO:0043200,response to amino acid,0.0,0.0,-4.2723295489939765
GO:0007568,aging,0.0,0.0,-4.03842319866122
GO:0030855,epithelial cell differentiation,0.0,0.0,-4.816654951868918
GO:0006986,response to unfolded protein,0.0,0.0,-5.043081478094323
hsa00280,"Valine, leucine and isoleucine degradation",0.0,0.0,-5.913766182024196
GO:0032781,positive regulation of ATPase activity,0.0,0.0,-2.3493436804574364
GO:0002200,somatic diversification of immune receptors,0.0,0.0,-2.6589009387358455
GO:0002082,regulation of oxidative phosphorylation,0.0,0.0,-2.2723641158858956
GO:0070848,response to growth factor,0.0,0.0,-2.6361981890610626
GO:0001919,regulation of receptor recycling,0.0,0.0,-2.6474692794768235
R-HSA-1852241,Organelle biogenesis and maintenance,0.0,0.0,-2.622216009855167
GO:0006271,DNA strand elongation involved in DNA replication,0.0,0.0,-8.599993607975364
CORUM:10,Condensin I complex,0.0,0.0,-9.710428402394609
hsa04146,Peroxisome,0.0,0.0,-6.313228526801285
GO:1903649,regulation of cytoplasmic transport,0.0,0.0,-6.379163257209425
hsa00030,Pentose phosphate pathway,0.0,0.0,-8.883449855032087
GO:1990748,cellular detoxification,0.0,0.0,-9.141213074757
GO:0006979,response to oxidative stress,0.0,0.0,-10.575169851328594
hsa00480,Glutathione metabolism,0.0,0.0,-12.02218861418182
R-HSA-69190,DNA strand elongation,0.0,0.0,-13.39703379107422
GO:0044270,cellular nitrogen compound catabolic process,-9.882672232185808,-3.7594904459682503,-7.679896801746203
R-HSA-69278,"Cell Cycle, Mitotic",-6.573157149037426,-3.3065433609675066,-13.787820848194146
R-HSA-15869,Metabolism of nucleotides,-4.690478457647543,-5.424419879206202,-6.5763901917836725
GO:0051186,cofactor metabolic process,-5.339980935180193,-5.90517057580436,-18.335850374917186
GO:0045055,regulated exocytosis,-8.286659487240753,-3.377659837303143,-5.205775417428632
GO:0097435,supramolecular fiber organization,-7.263119002006805,-2.6408217530976597,-4.664822006543836
GO:0032787,monocarboxylic acid metabolic process,-2.8881996843133697,-4.13291006808049,-13.426409576910137
GO:0022411,cellular component disassembly,-3.3008833700774027,-2.6589597225281434,-4.506009877287018
GO:0000904,cell morphogenesis involved in differentiation,-3.758620716400655,-2.9672106156952665,-4.612294168342304
GO:0042177,negative regulation of protein catabolic process,-3.0182427962917244,-2.6560776781432147,-3.8023154653121476
GO:0009611,response to wounding,-3.3763841234844554,-2.1231707119389998,-3.3507427276827593
GO:1902850,microtubule cytoskeleton organization involved in mitosis,-2.9471479400534264,-3.5653074375076708,-5.299859196004466
GO:1903827,regulation of cellular protein localization,-4.199240218161585,-2.1832123992311914,-2.4084734238386685
GO:0031400,negative regulation of protein modification process,-3.6652388662063444,-2.353916302254356,-2.1725554541796774
GO:0051701,interaction with host,-2.343957738590493,-2.001527527801554,-2.0182158700003097
GO:2001234,negative regulation of apoptotic signaling pathway,-2.1422567759975784,-3.397087503332961,-2.800106184391346
GO:0006520,cellular amino acid metabolic process,-2.198756140735573,-5.671961996129464,-2.5224411946958774
GO:0007163,establishment or maintenance of cell polarity,-5.053971196122853,0.0,-4.209867920051122
R-HSA-2262752,Cellular responses to stress,-5.506461456395984,0.0,-3.31951481326058
R-HSA-445355,Smooth Muscle Contraction,-3.515932345198784,0.0,-6.4761610101559794
GO:0044772,mitotic cell cycle phase transition,-3.1389068336989663,0.0,-5.755772267830939
GO:0051345,positive regulation of hydrolase activity,-3.6628613386548303,0.0,-2.3893969614824475
GO:0051272,positive regulation of cellular component movement,-2.4535676686713317,0.0,-3.1886073127219254
